12. Kaynar AM, Shankar KB: Epidural infusion: Continuous or bolus? *Anesth Analg* 1999; 89:534
13. Capogna G, Camorcia M, Stirparo S, Farcomeni A: Programmed intermittent epidural bolus *versus* continuous epidural infusion for labor analgesia: The effects on maternal motor function and labor outcome. A randomized double-blind study in nulliparous women. *Anesth Analg* 2011; 113:826–31
14. Chua SM, Sia AT: Automated intermittent epidural boluses improve analgesia induced by intrathecal fentanyl during labour. *Can J Anaesth* 2004; 51:581–5
15. Fettes PD, Moore CS, Whiteside JB, McLeod GA, Wildsmith JA: Intermittent vs continuous administration of epidural ropivacaine with fentanyl for analgesia during labour. *Br J Anaesth* 2006; 97:359–64

## ANESTHESIOLOGY REFLECTIONS FROM THE WOOD LIBRARY-MUSEUM

### Dibucaine, Cinchocaine, or Nupercaine? CIBA's Trademarked Long-acting Amide Local Anesthetic

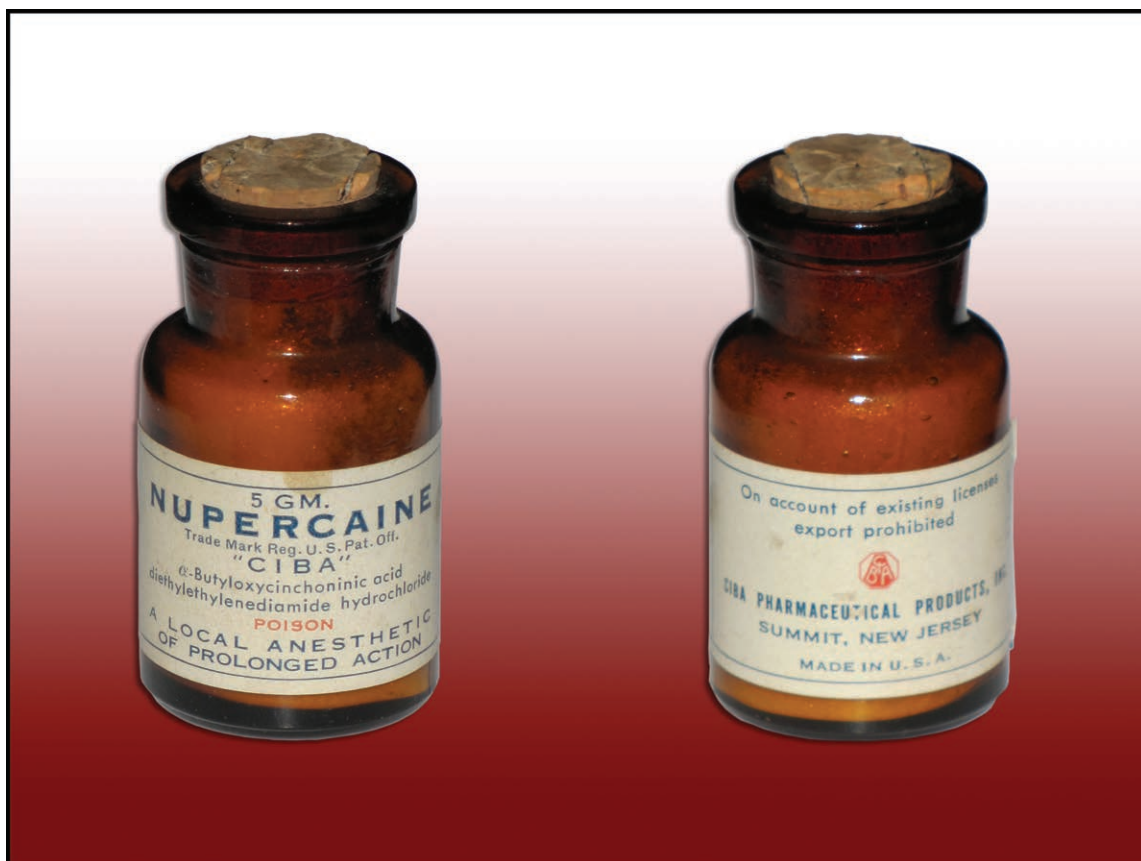

In 1930, pioneering British surgeon-anesthetist W. Howard Jones published his clinical experiences with a long-acting amide local anesthetic related to “butyloxycinchoninic acid diethylethylenediamide.” That lengthy chemical designation would be abbreviated to dibucaine in the United States and cinchocaine internationally (“cincho” reflecting the chemical similarity to quinine). Dr. Jones published articles about this anesthetic initially under the brand name Percaine, but he predicted that Americans would brand it as Nupercaine. Indeed, from Summit, New Jersey, CIBA Pharmaceuticals would eventually distribute the 5g bottles (*above*) bearing the trademark “Nupercaine.” (Copyright © the American Society of Anesthesiologists' Wood Library-Museum of Anesthesiology.)

*George S. Bause, M.D., M.P.H., Honorary Curator and Laureate of the History of Anesthesia, Wood Library-Museum of Anesthesiology, Schaumburg, Illinois, and Clinical Associate Professor, Case Western Reserve University, Cleveland, Ohio. UJYC@aol.com.*
